# Supplementary material
Source: Research Square preprint supplement (doi:10.21203/rs.3.rs-9074930/v1)
Supplement: Supplementary file 1 [file 4b5bec17726a14be81a41ffc.docx]

**Supplementary Material**

**Table S1.** Primersused in the study.

| **Primer** | **Category** | **Function** | **Sequence (5‘to 3‘) F/R** | **Gene ID** | **Reference Sequence (GenBank accession)** | **Amplicon size(bp)** | **Reference** |
| --- | --- | --- | --- | --- | --- | --- | --- |
| *flaA* | Motility | Polar flagella | CGGACTAAACCGTATCGCTGAAA  /GGCTGCCCATAGAAAGCATTACA | Not found | GQ433373.1 | 128 | [1] |
| *flgB* | Motility | Polar flagella | GTACATCCAGAGGCACTCAAT  /AACTTAGGTCTTTCGCCAAGTA | 1190952 | NC_004605.1 | 103 | [2] |
| *flgL* | Motility | Polar flagella | CGTCAGCGTCCACCACTT /GCGGCTCTGACTTACTGCTA | 1190962 | CP066246.1 | 141 | [1] |
| *mam7* | Adhesion | Multivalent Adhesion Molecule 7; mediating host binding and initiation of infection. | TTTGGCGTCAGCAGCAATTC /CGCCAGGAACGATAGTGAGG | 1189118 | NC_004603.1 | 149 | [3] |
| *gbpA* | Adhesion | Chitin/GlcNAc-binding adhesin mediating environmental and intestinal attachment. | CCTCACTCTTACCGCAGAGG /CAAGGTTGCCATCGGTATCT | 1192294 | NC_004605.1 | 191 | [3] |
| *mshA* | Adhesion | Mannose-sensitive haemagglutinin (MSHA) crucial for surface adhesion and early biofilm attachment. | GCTTAGCCGTACTCGTTGCT /TGTAGTTGGCGGAGCATACA | 1191436 | NC_004605.1 | 160 | [3, 4] |
| *mshD* | Adhesion | MSHA pilus-associated protein contributing to adhesion and biofilm formation. | GCG TGG TTT TGA TGA GAA CAG /TCA GTG TCA GAG GTT GAG TG | 1190240 | NC_004603.1 | 368 | [5] |
| *pilA* | Adhesion | Type IV pili, adhesion, biofilm formation | GGCTGAGCTGCATTACCAAG /TTGCAGCGTCTCTTGTGAAC | 1190038 | NC_004603.1 | 194 | [3, 4] |
| *ompW* | Surface Attachment | Outer membrane protein involved in surface interaction and environmental adaptation | TCG TGT CAC CAA GTG TTT TCG /CGT GGC TGA ATG GTG TTG C | 1190775 | NC_004605.1 | NA* | [5] |
| *luxS* | QS | Autoinducer binding domain-containing protein;QS regulator | GGATTTTGTTCTGGCTTTCCACTT /GGGATGTCGCACTGGTTTTTAC | 1190052 | CP066246.1 | 119 | [1] |
| *luxM* | QS | HAI-1 (AI-1) autoinducer synthase of the Vibrio QS system. | TGCCCTTGTTGTCACTTTCT  /CGTTGGTTCCAGTCTTGGATTA | Not found | Not found | NA* | [6, 7] |
| *aphA* | QS | Acid phosphatase AphA; Low-cell-density master regulator promoting adhesion and early biofilm genes. | ACACCCAACCGTTCGTGATG /GTTGAAGGCGTTGCGTAGTAAG | 1190312 | CP066246.1 | 162 | [1] |
| *opaR* | QS | Transcriptional regulator OpaR; High-cell-density master regulator repressing motility and modulating virulence/biofilm. | TGTCTACCAACCGCACTAACC /TTGAAGCGGTTTGCTTGTACG | 1190031 | NC_004603.1 | 154 | [3, 8] |
| *qsvR (VPA0606)* | QS | AraC-type transcriptional regulator QsvR; QS regulator | TAC ACC GCC ACC CAT AAC G /AGC CAT TCT CGC CAG GTA TG | 1191295 | NC_004605.1 | 157 | [9] |
| *cqsA* | QS | QS regulator, exhibits swarming defects in the absence of CqsA, LuxMvp | ACTTCCACACTCAAGAGCAATA  /GTTCAAGCGAGCCAAAGAAC | 1191400 | NC_004605.1 | 94 | [6] |
| *gefA (VPA0202)* | c-di-GMP | GGDEF domain -cyclic di-GM, increases c-di-GMP and promotes EPS/biofilm formation. | CGAAGAAGTGATGGTGGTG /CTCGCATTGGTGAGTTGACG | 1190890 | NC_004605.1 | NA* | [10, 11] |
| *gefB (VPA1478)* | c-di-GMP | GGDEF domain -cyclic di-GM enhancing EPS production and repressing motility. | CCTGACTTTCCCATTTACT /CTTGCTTTGACCGACAGTA | 1192174 | NC_004605.1 | 319 | [10, 11] |
| *scrA* | c-di-GMP | Part of the ScrABC (VPA1513-11) surface-sensing system regulating GGDEF/EAL activity and motility–biofilm switching. | CTAATCGCAGCCGACGTAAT  /GAGCTTGTGCTACACCTGAA | 1192209 | NC_004605.1 | 93 | [12, 13] |
| *vp0950* | Biofilm | Biofilm-associated surface proteins linked to persistence and colonization | GCCAAACTTCTCAAACAACA /ATGAAACGCAATTTACCATC | 1188454 | NC_004603.1 | 304 | [14] |
| *vp0952* | Biofilm | Biofilm-associated surface proteins linked to persistence and colonization | TATGATGGTGTTTGGTGC  /TGTTTTTCTGAGCGTTTC | 11884  56 | CP064041.1 | 276 | [1, 15] |
| *vp0962* | Biofilm | Biofilm-associated surface proteins linked to persistence and colonization | GACCAAGACCCAGTGAGA  /GGTAAAGCCAGCAAAGTT | 1188466 | CP064041.1 | 358 | [1, 15] |
| *cpsA* | Biofilm | Capsular polysaccharide biosynthesis gene involved in EPS production. | GAGAGCGGCAACCTATATCG /GCGGTCAAACAAAGGGTAAAC | 1192099 | NC_004605.1 | 141 | [16–18] |
| *cpsQ (VPA1446)* | Biofilm | LuxR-family transcriptional activator of CPS and biofilm-related operons. | GCC TGA AATCCTAATGCTC /AGTGTC AGA AGG TGTATC AAC | 1192142 | NC_004605.1 | 181 | [19, 20] |
| *mfpA (VPA1443)* | Biofilm | Membrane fusion protein; matrix-associated membrane fusion protein of the cpsQ–mfpABC operon. | GCG GGC AATGATCGTCTA AC /TCACCTGAACCTGCG ACA AG | 1192139 | NC_004605.1 | 170 | [19, 20] |
| *calR* | Biofilm | LysR-type transcriptional regulator; T3SS/T6SS, biofilm formation. | ATG TAA AAAGAA AACCGTACA /AAC ACAGCAGAATGACCG TG | 1187817 | NC_004605.1 | 157 | [19, 20] |
| *scvA* | Virulence Machinery (T6SS2) | EPS biosynthesis; T6SS2 structural components. | ACCCAAGACAAACTAGCGATTG /CGTGCTGGAGGTTGATTTCG | 1188983 | NC_004603.1 | 130 | [16, 21] |
| *scvE* | Virulence Machinery (T6SS2) | EPS biosynthesis; T6SS2 structural components. | GACAGGTCGTGATGCCATTC /GGCGATGATGACCGAAGTG | 1188987 | NC_004603.1 | 141 | [16, 21, 22] |
| *scvO* | Virulence Machinery (T6SS2) | EPS biosynthesis; T6SS2 structural components. | GTTCATTGCTCTTGCCATCA /CGAGGGCCAATCATAGACAT | 1188997 | NC_004603.1 | 276 | [22] |
| *tssL2 (VPA1040)* | Virulence Machinery (T6SS2) | Core membrane-anchoring protein of T6SS2; deletion affects motility and biofilm phenotypes. | CTTCCGCACTGCTTGTTTGT /AACTGCTGGGGTTGGTTGAA | 1191735 | NC_004605.1 | 110 | [19] |
| *tlh* | Toxins & Stress Response | Thermolabile hemolysin; species marker and cytotoxic virulence factor. | AAA GCG GAT TAT GCA GAA GCA CTG /GCT ACT TTC TAG CAT TTT CTC TGC | 1190914 | NC_004605.1 | 450 | [23] |
| *oxyR* | Toxins & Stress Response | Oxidative stress response regulator controlling ROS-defense and biofilm/motility modulation. | TCG TCA GCT AGA GGA AGG /TGG TCG CGT AAG CAA TGC | 1190302 | NC_004603.1 | 210 | [24] |
| *tnaA* | Toxins & Stress Response | Tryptophanase; produce indole inhibit biofilm formation | TGTACGAAATTGCCACCAAA /TCAGCGTAACCTTCTTCACG | 1190879 | NC_004605.1 | 103 | [5] |
| *vp0619* | Chitinase | ChiB-like chitinase enabling growth on chitin and natural competence. | GTGATGCATCTGTATTGCTG  /CCAAGTCCGGTCAATTACATG | 1188094 | NC_004603.1 | 134 | [25] |
| *vp2338* | Chitinase | Chitinase facilitating environmental survival on crustacean surfaces. | GATTGCGACAGACAATGAAG  /GTGAGAGTAATGCTAGGTGG | 1189851 | NC_004603.1 | 96 | [25] |
| *VPA1177* | Chitinase | Secreted chitinase involved in chitin degradation and nutrient acquisition | CTCAGTTAACGTGCCATACAAAG  /CATTGTCCAACCACCAAAAGAAG | 1191873 | NC_004605.1 | 103 | [25] |
| 16S rRNA | Housekeeping gene (reference) | 16S ribosomal RNA; conserved bacterial rRNA gene used as an internal reference for normalization. | ACGGCCTGGGGAGTACGGTC  /TTGCGCTCGTTGCGGGACTT | NA* | NC_004605.1 | NA* | This study |
| *recA* | Housekeeping gene (reference) | Recombinase A; ATP-dependent DNA strand exchange protein; commonly used as a housekeeping reference gene for normalization. | GAAACCATTTCAACGGGTTC  /GTGCAGCAGCGATAAGCTC | 1190074 | NC_004603.1 | 139 | This study |

**NA, not available. The predicted in silico amplicon sizes were approximately 120 bp for luxM, 210 bp for ompW, and 100 bp for gefA.*

**Table S2.** Total viable cell counts (log₁₀ CFU/mL) of *V. parahaemolyticus* strains at two initial inoculation densities

| **Strain** | **OD600 0.1 (Mean ± SD, log10 CFU/mL)** | **OD600 0.5 (Mean ± SD, log10 CFU/mL)** |
| --- | --- | --- |
| R1 | 8.0 ± 0.1 | 8.4 ± 0.1 |
| R3 | 7.5 ± 0.2 | 8.4 ± 0.1 |
| R4 | 7.9 ± 0.2 | 8.2 ± 0.0 |
| VP1 | 7.8 ± 0.2 | 8.1 ± 0.5 |
| VP2 | NA*** | NA*** |
| VP3 | 7.5 ± 0.2 | 8.4 ± 0.2 |
| VP4 | 7.5 ± 0.3 | 8.2 ± 0.0 |
| VP5 | 7.3 ± 0.0 | 8.4 ± 0.1 |
| VP7 | 8.2 ± 0.0 | 8.8 ± 0.1 |
| VP8 | 5.8 ± 3.0 | 8.4 ± 0.5 |
| VP11 | 7.8 ± 0.2 | 8.4 ± 0.0 |
| VP12 | 8.2 ± 0.2 | 8.6 ± 0.0 |
| VP14 | 8.3 ± 0.3 | 8.7 ± 0.0 |
| VP15 | 7.7 ± 0.1 | 8.4 ± 0.0 |
| VP16 | 7.9 ± 0.0 | 8.5 ± 0.0 |
| VP17 | 7.3 ± 0.0 | 8.4 ± 0.0 |
| VP18 | 7.5 ± 0.3 | 8.0 ± 0.0 |
| VP19 | 7.8 ± 0.2 | 8.4 ± 0.2 |
| VP20 | 7.1 ± 0.1 | 7.7 ± 0.5 |
| VP21 | 7.8 ± 0.3 | 8.5 ± 0.1 |
| VP22 | 7.5 ± 0.2 | 8.5 ± 0.1 |
| VP23 | 7.8 ± 0.2 | 8.3 ± 0.2 |
| VP24 | 7.7 ± 0.6 | 8.3 ± 0.1 |
| VP25 | 7.8 ± 0.3 | 8.6 ± 0.2 |
| VP26 | 7.5 ± 0.3 | 8.2 ± 0.2 |
| VP27 | 7.5 ± 0.0 | 8.2 ± 0.2 |

**NA, not available. Mean ± SD of* *log₁₀ CFU/mL determined by tenfold serial dilution in TSB.*

**Table S3**. Type III tests of fixed effects for swimming

| **Source** | **F** | ***p*-value** |
| --- | --- | --- |
| Time | 368.31 | <0.001 |
| Group | 10.07 | 0.004 |
| Temperature | 76.65 | <0.001 |
| Time × Temperature | 36.92 | <0.001 |

**Table S4**. Type III tests of fixed effects for swarming

| **Source** | **F** | ***p*-value** |
| --- | --- | --- |
| Time | 331.90 | <0.001 |
| Group | 8.65 | 0.007 |
| Temperature | 75.61 | <0.001 |
| Time × Group | 18.00 | <0.001 |
| Time × Temperature | 36.45 | <0.001 |
| Group × Temperature | 5.46 | 0.004 |

**Table S5**. Type III tests of fixed effects for BFI

| **Source** | **F** | ***p*-value** |
| --- | --- | --- |
| Group | 1.54 | 0.227 |
| Temperature | 7.89 | <0.001 |

**Table S6**. Pearson correlation coefficients among motility traits and biofilm formation at 24 h across all temperatures. (*p*<0.05)

| **Variable pair** | ***r*** | ***p*-value** |
| --- | --- | --- |
| Swimming – Swarming | 0.59 | <0.001 |
| Swimming – BFI | 0.00 | 0.997 |
| Swarming – BFI | 0.09 | 0.166 |

**Table S7.** Spearman correlation between gene expression levels and BFI across all strains.

|  | Correlation coefficient | P value | FDR-corrected *p*-values |
| --- | --- | --- | --- |
| *gefB* | 0.559** | 0.003 | 0.095597 |
| *cpsQ* | 0.388 | 0.050 | 0.433187 |
| *tssL2* | 0.388 | 0.050 | 0.433187 |
| *mfpA* | 0.380 | 0.056 | 0.433187 |
| *scrA* | -0.364 | 0.068 | 0.433187 |
| *gefA* | 0.343 | 0.086 | 0.460271 |
| *opaR* | -0.317 | 0.115 | 0.525846 |
| *ompW* | 0.289 | 0.152 | 0.544765 |
| *vp0950* | 0.294 | 0.154 | 0.544765 |
| VPA1177 | -0.283 | 0.170 | 0.544765 |
| *flaA* | -0.262 | 0.197 | 0.56007 |
| *luxM* | -0.260 | 0.210 | 0.56007 |
| *cpsA* | 0.241 | 0.235 | 0.577973 |
| *flgB* | -0.212 | 0.310 | 0.708499 |
| *vp0619* | -0.194 | 0.342 | 0.729051 |
| *luxS* | -0.168 | 0.413 | 0.826565 |
| *oxyR* | 0.120 | 0.560 | 0.895259 |
| *mshA* | 0.164 | 0.631 | 0.895259 |
| *qsvR* | 0.098 | 0.633 | 0.895259 |
| *vp0962* | 0.090 | 0.663 | 0.895259 |
| *gbpA* | 0.088 | 0.669 | 0.895259 |
| *vp2338* | 0.086 | 0.677 | 0.895259 |
| *scvE* | -0.084 | 0.682 | 0.895259 |
| *vp0952* | 0.080 | 0.699 | 0.895259 |
| *tnaA* | -0.078 | 0.706 | 0.895259 |
| *scvO* | 0.072 | 0.727 | 0.895259 |
| *tlh* | 0.060 | 0.781 | 0.925136 |
| *aphA* | -0.047 | 0.822 | 0.938887 |
| *scvA* | 0.031 | 0.881 | 0.951305 |
| *mam7* | 0.028 | 0.892 | 0.951305 |
| *flgL* | 0.015 | 0.942 | 0.97223 |
| *cqsA* | 0.005 | 0.980 | 0.980161 |


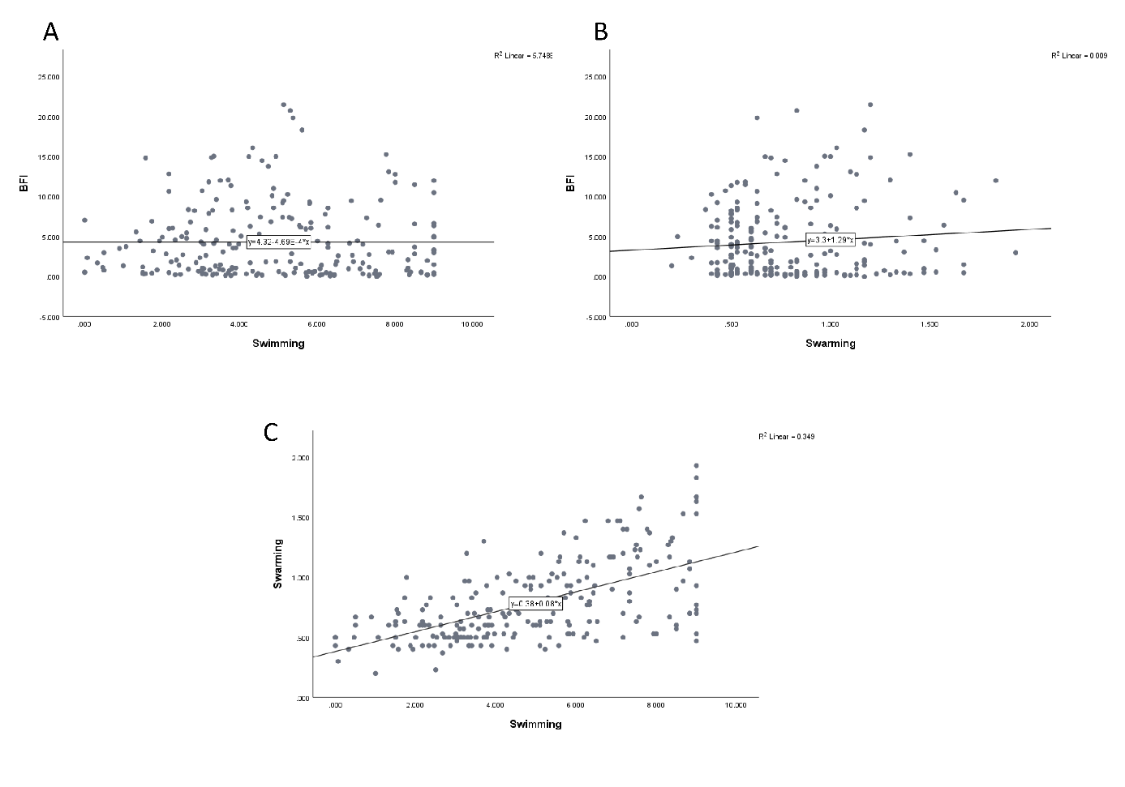


**Fig. S1.** Correlations between **A)** BFI and swimming, **B)** BFI and swarming, **C)** swimming and swarming.


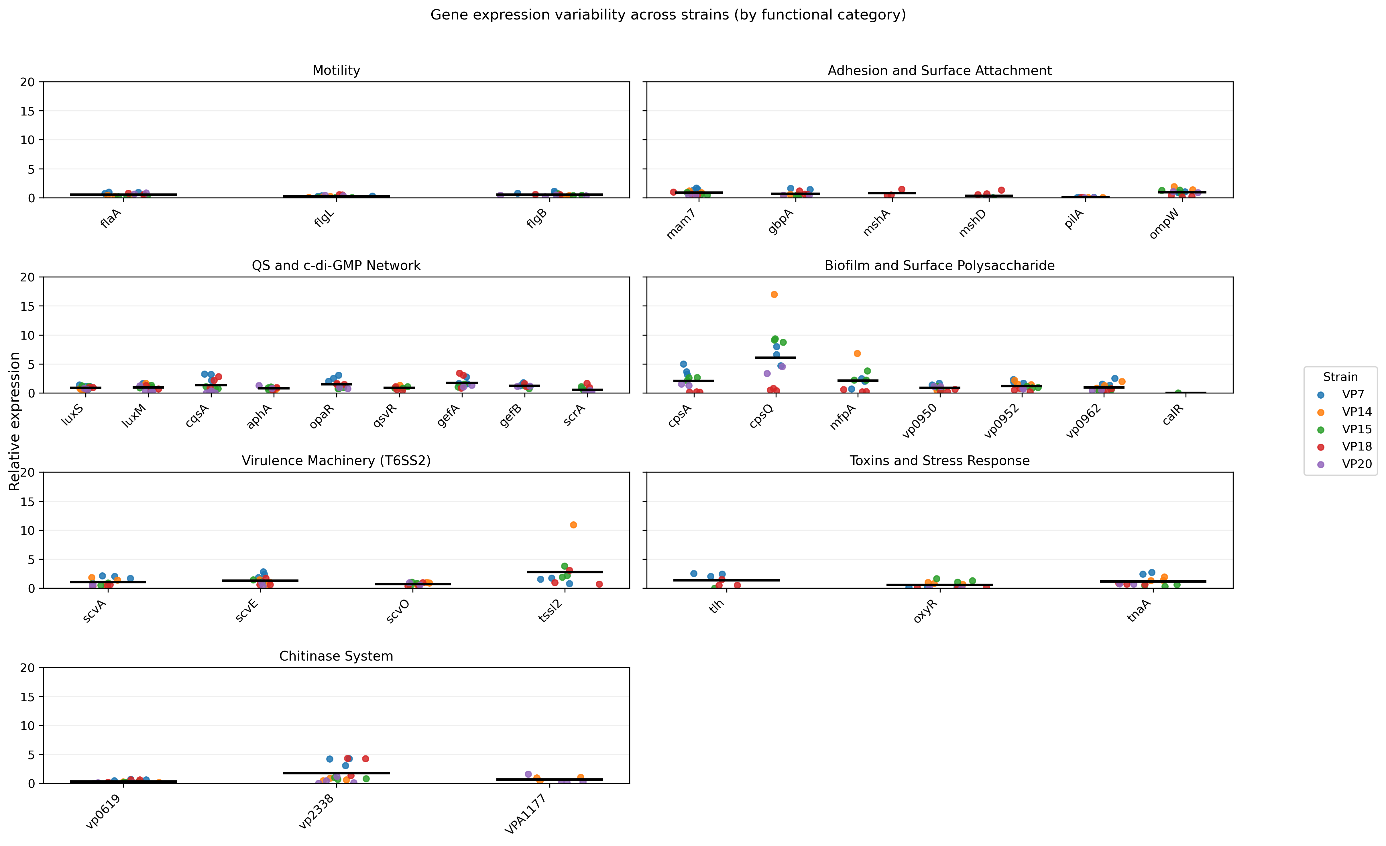


**Fig. S2**. Relative gene expression levels of selected genes measured under standardized planktonic growth conditions at 30 °C in strains exhibiting a high biofilm formation index (BFI). Genes are grouped by functional category. Horizontal bars indicate group medians. Each color represents one specific strain.

**References**

1. Roy PK, Park SH, Song MG, Park SY. Antimicrobial efficacy of Quercetin against *Vibrio parahaemolyticus* biofilm on food surfaces and downregulation of virulence genes. Polymers (Basel) 2022. https://doi.org/10.3390/polym14183847.

2. Chang J, Zhou Y, Zhang M, Li X, Zhang N, Luo X, et al. CalR inhibits the swimming motility and polar flagellar gene expression in *Vibrio parahaemolyticus*. J. Microbiol. 2024;62:1125–32. https://doi.org/10.1007/s12275-024-00179-0.

3. Billaud M, Seneca F, Tambutté E, Czerucka D. An increase of seawater temperature upregulates the expression of *Vibrio parahaemolyticus* virulence factors implicated in adhesion and biofilm formation. Front. Microbiol. 2022. https://doi.org/10.3389/fmicb.2022.840628.

4. Aagesen AM, Phuvasate S, Su Y-C, Häse CC. Characterizing the adherence profiles of virulent *Vibrio parahaemolyticus* isolates. Microb. Ecol. 2018;75:152–62. https://doi.org/10.1007/s00248-017-1025-8.

5. Meng L, Alter T, Aho T, Huehn S. Gene expression profiles of *Vibrio parahaemolyticus* in viable but non-culturable state. FEMS Microbiol. Ecol. 2015;91:fiv035. https://doi.org/10.1093/femsec/fiv035.

6. Liu F, Wang F, Yuan Y, Li X, Zhong X, Yang M. Quorum sensing signal synthases enhance *Vibrio parahaemolyticus* swarming motility. Mol. Microbiol. 2023;120:241–57. https://doi.org/10.1111/mmi.15113.

7. Simpson CA, Petersen BD, Haas NW, Geyman LJ, Lee AH, Podicheti R, et al. The quorum-sensing systems of *Vibrio campbellii* DS40M4 and BB120 are genetically and functionally distinct. bioRxiv. 2021:2020.03.31.019307. https://doi.org/10.1101/2020.03.31.019307.

8. Wang D, Fletcher GC, Gagic D, On SLW, Palmer JS, Flint SH. Comparative genome identification of accessory genes associated with strong biofilm formation in *Vibrio parahaemolyticus*. Food Res Int. 2023;166:112605. https://doi.org/10.1016/j.foodres.2023.112605.

9. Faleye OS, Sathiyamoorthi E, Lee J-H, Lee J. Inhibitory effects of cinnamaldehyde derivatives on biofilm formation and virulence factors in *Vibrio* species. Pharm. 2021;13:2176. https://doi.org/10.3390/pharmaceutics13122176

10. Song J, Hou HM, Wu HY, Li KX, Wang Y, Zhou QQ, Zhang GL. Transcriptomic analysis of *Vibrio parahaemolyticus* reveals different virulence gene expression in response to benzyl isothiocyanate. Molecules 2019. https://doi.org/10.3390/molecules24040761.

11. Zhong X, Lu Z, Wang F, Yao N, Shi M, Yang M. Characterization of GefA, a GGEEF domain-containing protein that modulates *Vibrio parahaemolyticus* motility, biofilm formation, and virulence. Appl. Environ. Microbiol. 2022;88:e02239-21. https://doi.org/10.1128/aem.02239-21.

12. Hammerl JA, Göllner C, Jäckel C, Swidan F, Gutmann H, Strauch E. The acquisition of the scr gene cluster encoding sucrose metabolization enzymes enables strains of *Vibrio parahaemolyticus* and *Vibrio vulnificus* to utilize sucrose as carbon source. Front. Microbiol. 2021. https://doi.org/10.3389/fmicb.2021.754464.

13. Trimble MJ, McCarter LL. Bis-(3′-5′)-cyclic dimeric GMP-linked quorum sensing controls swarming in *Vibrio parahaemolyticus*. Proc. Natl. Acad. Sci. 2011;108:18079–84. https://doi.org/10.1073/pnas.1113790108.

14. Bechlars S, Jäckel C, Diescher S, Wüstenhagen DA, Kubick S, Dieckmann R, Strauch E. Characterization of *trh2* harbouring *Vibrio parahaemolyticus* strains isolated in Germany. PLoS One. 2015;10:e0118559. https://doi.org/10.1371/journal.pone.0118559.

15. Ashrafudoulla M, Mizan MFR, Park H, Byun K-H, Lee N, Park SH, Ha S-D. Genetic relationship, virulence factors, drug resistance profile and biofilm formation ability of *Vibrio parahaemolyticus* isolated from mussel. Front. Microbiol. 2019.

16. Chen L, Zhang M, Li X, Wu Q, Xue X, Zhang T, et al. AphA directly activates the transcription of polysaccharide biosynthesis gene scvE in *Vibrio parahaemolyticus*. Gene. 2023;851:146980. https://doi.org/10.1016/j.gene.2022.146980.

17. Wu Q, Li X, Zhang T, Zhang M, Xue X, Yang W, et al. Transcriptomic analysis of *Vibrio parahaemolyticus* underlying the wrinkly and smooth phenotypes. Microbiol. Spectr. 2022;10:e02188-22. https://doi.org/10.1128/spectrum.02188-22.

18. Zhang L, Weng Y, Wu Y, Wang X, Yin Z, Yang H, et al. H-NS is an activator of exopolysaccharide biosynthesis genes transcription in *Vibrio parahaemolyticus*. Microb. Pathog. 2018;116:164–7. https://doi.org/10.1016/j.micpath.2018.01.025.

19. Bai X, Liu P, Wang W, Jin Y, Wang Q, Qi Y, et al. TssL2 of T6SS2 is required for mobility, biofilm formation, wrinkly phenotype formation, and virulence of *Vibrio parahaemolyticus SH112*. Appl. Microbiol. Biotechnol. 2024;108:537. https://doi.org/10.1007/s00253-024-13351-8.

20. Zhang Y, Qiu Y, Xue X, Zhang M, Sun J, Li X, et al. Transcriptional regulation of the virulence genes and the biofilm formation associated operons in *Vibrio parahaemolyticus*. Gut Pathog. 2021;13:15. https://doi.org/10.1186/s13099-021-00410-y.

21. Zhang M, Xue X, Li X, Wu Q, Zhang T, Yang W, et al. QsvR and OpaR coordinately repress biofilm formation by *Vibrio parahaemolyticus*. Front. Microbiol. 2023. https://doi.org/10.3389/fmicb.2023.1079653.

22. Liu M, Nie H, Luo X, Yang S, Chen H, Cai P. A polysaccharide biosynthesis locus in *Vibrio parahaemolyticus* important for biofilm formation has homologs widely distributed in aquatic bacteria mainly from *Gammaproteobacteria*. mSystems. 2022;7:e01226-21. https://doi.org/10.1128/msystems.01226-21.

23. Palamae S, Mittal A, Yingkajorn M, Saetang J, Buatong J, Tyagi A, et al. *Vibrio parahaemolyticus* isolates from Asian green mussel: molecular characteristics, virulence and their inhibition by chitooligosaccharide-tea polyphenol conjugates. Foods 2022. https://doi.org/10.3390/foods11244048.

24. Chung C-H, Fen S, Yu S-C, Wong H. Influence of oxyR on Growth, Biofilm Formation, and Mobility of Vibrio parahaemolyticus. Appl. Environ. Microbiol. 2016;82:788–96. https://doi.org/10.1128/AEM.02818-15.

25. Hirano Takako, Okubo Manabu, Tsuda Hironobu, Yokoyama Masahiro, Hakamata Wataru, Nishio Toshiyuki. Chitin Heterodisaccharide, released from chitin by chitinase and chitin oligosaccharide deacetylase, enhances the chitin-metabolizing ability of *Vibrio parahaemolyticus*. J. Bacteriol. 2019;201:10.1128/jb.00270-19. https://doi.org/10.1128/jb.00270-19.
